# Supplementary material
Source: PubMed Central journal article supplement (PMC5328121)
Supplement: NIHMS843082-supplement-Supplemental_Material.pdf [file NIHMS843082-supplement-Supplemental_Material.pdf]

# **SUPPLEMENTAL MATERIAL**

**Circulation: Cardiovascular Quality and Outcomes**

**“Neighborhood differences in post-stroke mortality”**

**Authors: Theresa L. Osypuk; Amy Ehntholt; J. Robin Moon; Paola Gilsanz; M. Maria Glymour**



**SUPPLEMENTAL MATERIAL**

*Circulation: Cardiovascular Quality and Outcomes*  
 "Neighborhood differences in post-stroke mortality"  
 Osypuk et al.

|                                       |      |     |     |     |      |     |     |     |     |     |     |     |      |     |     |     |
|---------------------------------------|------|-----|-----|-----|------|-----|-----|-----|-----|-----|-----|-----|------|-----|-----|-----|
| Elevated                              | 339  | 74% | 69% | 78% | 1001 | 90% | 88% | 92% | 273 | 78% | 73% | 83% | 1070 | 89% | 87% | 90% |
| Not Elevated                          | 855  | 74% | 71% | 77% | 3226 | 94% | 93% | 95% | 696 | 79% | 76% | 82% | 3398 | 93% | 92% | 94% |
| Missing                               | 155  | 77% | 70% | 83% | 566  | 89% | 86% | 92% | 132 | 82% | 75% | 88% | 590  | 88% | 86% | 91% |
| <b>Memory functioning at baseline</b> |      |     |     |     |      |     |     |     |     |     |     |     |      |     |     |     |
| High*                                 | 454  | 73% | 69% | 77% | 2138 | 95% | 94% | 96% | 371 | 76% | 72% | 81% | 2227 | 94% | 93% | 95% |
| Low                                   | 696  | 75% | 72% | 78% | 1901 | 90% | 88% | 91% | 572 | 81% | 78% | 85% | 2033 | 88% | 87% | 90% |
| Missing                               | 199  | 73% | 67% | 79% | 754  | 92% | 90% | 94% | 158 | 76% | 69% | 83% | 798  | 90% | 88% | 92% |
| <b>Current smoker</b>                 |      |     |     |     |      |     |     |     |     |     |     |     |      |     |     |     |
| Smoker                                | 152  | 82% | 75% | 88% | 530  | 92% | 90% | 95% | 123 | 86% | 80% | 92% | 558  | 91% | 89% | 93% |
| Non-smoker                            | 1196 | 73% | 71% | 76% | 4261 | 93% | 92% | 93% | 977 | 78% | 75% | 81% | 4498 | 91% | 91% | 92% |
| <b>Hypertension</b>                   |      |     |     |     |      |     |     |     |     |     |     |     |      |     |     |     |
| Hypertensive                          | 719  | 76% | 73% | 79% | 2097 | 91% | 90% | 92% | 590 | 81% | 77% | 84% | 2235 | 90% | 89% | 91% |
| Not hypertensive                      | 629  | 72% | 69% | 76% | 2693 | 94% | 93% | 95% | 510 | 77% | 73% | 81% | 2820 | 92% | 91% | 93% |
| <b>Diabetes</b>                       |      |     |     |     |      |     |     |     |     |     |     |     |      |     |     |     |
| Diabetic                              | 229  | 78% | 73% | 84% | 569  | 90% | 87% | 92% | 192 | 82% | 77% | 88% | 611  | 89% | 86% | 91% |
| Not diabetic                          | 1119 | 73% | 71% | 76% | 4221 | 93% | 92% | 94% | 908 | 78% | 76% | 81% | 4444 | 92% | 91% | 93% |
| <b>Heart disease</b>                  |      |     |     |     |      |     |     |     |     |     |     |     |      |     |     |     |
| Heart disease                         | 460  | 80% | 76% | 83% | 1309 | 91% | 90% | 93% | 385 | 82% | 79% | 86% | 1388 | 90% | 88% | 91% |
| No heart disease                      | 887  | 71% | 68% | 74% | 3482 | 93% | 92% | 94% | 715 | 77% | 74% | 80% | 3667 | 92% | 91% | 93% |

Sensitivity sample is 76 subjects less than the specificity sample (those false-negative cases who had missing first post-stroke proxy status).

We considered events strokes if the ICD-9 codes 430, 431, 433.01, 433.11, 433.21, 433.31, 433.81, 433.91, 434.00, 434.01, 434.10, 434.11, 434.90, 434.91, 435.0, 435.1, 435.3, 435.8, 435.9, 436, 997.02 were noted in any diagnosis on the claim. If the billing occasion included any ICD codes between 800 and 804.9 (inclusive) or between 850 and 854.1 (inclusive), or if the principal diagnosis for the billing occasion was V57.xx, this event was not considered a stroke, even if other ICD codes would have qualified as a stroke. If the diagnosis was based on outpatient services, we required two stroke-related claims within 12 months of each other to qualify the event as a stroke.

\* High memory functioning indicates performance at or above the median

SUPPLEMENTAL MATERIAL

*Circulation: Cardiovascular Quality and Outcomes*  
 "Neighborhood differences in post-stroke mortality"  
 Osypuk et al.

Appendix Table 2: Main Effects of Neighborhood Context on Hazard Ratio of Mortality.

|                                                              | Model 1 |              |        | Model 2 |              |       | Model 3 |              |        | Model 4 |              |       |
|--------------------------------------------------------------|---------|--------------|--------|---------|--------------|-------|---------|--------------|--------|---------|--------------|-------|
|                                                              | HR      | 95% CI       | p      | HR      | 95% CI       | p     | HR      | 95% CI       | p      | HR      | 95% CI       | p     |
| Higher Neigh<br>Social Ties                                  | 0.75    | (0.68 ,0.83) | <.0001 | 0.86    | (0.86 ,0.96) | 0.007 | 0.75    | (0.68 ,0.83) | <.0001 | 0.86    | (0.78 ,0.96) | 0.005 |
| Higher Neigh<br>Family Income<br>(ordinal, 4th vs. 1st<br>Q) | 0.76    | (0.70 ,0.83) | <.0001 | 0.88    | (0.80 ,0.96) | 0.005 | 0.94    | (0.85 ,1.03) | 0.156  | 0.95    | (0.86 ,1.04) | 0.239 |
| Higher Neigh<br>Deprivation<br>(ordinal, 4th vs. 1st<br>Q)   | 1.22    | (1.11 ,1.35) | <.0001 | 1.04    | (0.94 ,1.14) | 0.489 | 0.98    | (0.89 ,1.09) | 0.748  | 0.95    | (0.86 ,1.06) | 0.373 |
| High Neigh %<br>Poverty                                      | 1.15    | (1.06 ,1.24) | 0.001  | 1.06    | (0.98 ,1.15) | 0.120 | 1.05    | (0.97 ,1.14) | 0.212  | 1.03    | (0.95 ,1.12) | 0.418 |
| High Neigh %<br>Black                                        | 1.08    | (0.99 ,1.19) | 0.096  | 1.02    | (0.93 ,1.12) | 0.702 | 1.04    | (0.95 ,1.14) | 0.400  | 1.01    | (0.92 ,1.11) | 0.838 |
| High Neigh %<br>White                                        | 0.89    | (0.81 ,0.98) | 0.015  | 0.96    | (0.88 ,1.05) | 0.369 | 0.92    | (0.84 ,1.01) | 0.076  | 0.97    | (0.88 ,1.06) | 0.480 |
| High Neigh %<br>Foreign Born                                 | 0.91    | (0.78 ,1.06) | 0.220  | 0.84    | (0.72 ,0.98) | 0.030 | 0.89    | (0.77 ,1.04) | 0.135  | 0.83    | (0.71 ,0.97) | 0.021 |
| High Neigh %<br>Residentially<br>Stable                      | 0.98    | (0.92 ,1.05) | 0.623  | 0.96    | (0.90 ,1.03) | 0.259 | 0.95    | (0.88 ,1.01) | 0.114  | 0.95    | (0.89 ,1.02) | 0.159 |

## SUPPLEMENTAL MATERIAL

### *Circulation: Cardiovascular Quality and Outcomes*

#### "Neighborhood differences in post-stroke mortality"

Osypuk et al.

NOTES: Main effects of neighborhood context on hazard rate of mortality derived from main effect models adjusting for covariates and for each neighborhood factor individually. Model 1 adjusted for demographic variables: (stroke status, age, gender, race, ethnicity, southern birth, nativity, and marital status). Model 2 adjusted for demographics plus CVD risk factors (physical activity, ADL, IADL, obesity, alcohol use, smoking status, depressive symptoms, hypertension, diabetes, self-rated health). Model 3 adjusted for demographics plus SES variables (parental education, education, income, and wealth). Model 4 adjusted for demographic vars, SES vars, and CVD risk factors. Reference group for neighborhood family income (ordinal) is the first quartile, and reference group for neighborhood deprivation (ordinal) is the first quartile. The reference groups for categorical covariates are: female, non-Hispanic White or Other Race, unmarried, US born, born outside the South, high parental education, own education was 12 years, income 1<sup>st</sup> quartile, wealth 1<sup>st</sup> quartile, no IADL, no ADL, non-vigorous physical activity, normal weight, heavy alcohol use, never smoker, excellent/very good/good self rated health, no hypertension, no diabetes, low CESD. Q=Quartile. Neigh=neighborhood. These estimates are also reported in Figure 1. These results exclude any missing covariate data from the models, n=15,560.

SUPPLEMENTAL MATERIAL

*Circulation: Cardiovascular Quality and Outcomes*  
 "Neighborhood differences in post-stroke mortality"  
 Osypuk et al.

Appendix Table 3: Multiple Imputation Results for Stratum-Specific Estimates of Neighborhood Context on Survival  
 (Hazard Ratios of Mortality) within Strata of Ever-Stroke Status. Model 4.

|                                                            | Ever Stroke |              | Never Stroke |              | Inter-      |
|------------------------------------------------------------|-------------|--------------|--------------|--------------|-------------|
|                                                            | HR          | 95% CI       | HR           | 95% CI       | action<br>p |
| Higher Neighborhood Social Ties                            | 0.93        | (0.74 ,1.18) | 0.86         | (0.78 ,0.95) | 0.53        |
| Higher Neighborhood Family Income (ordinal, 4th vs. 1st Q) | 0.96        | (0.79 ,1.05) | 0.99         | (0.96 ,1.02) | 0.93        |
| Higher Neighborhood Deprivation (ordinal, 4th vs. 1st Q)   | 0.99        | (0.80 ,1.21) | 0.96         | (0.87 ,1.06) | 0.79        |
| High Neighborhood % Poverty                                | 1.07        | (0.91 ,1.25) | 1.02         | (0.94 ,1.11) | 0.59        |
| High Neighborhood % Black                                  | 1.08        | (0.91 ,1.28) | 1.04         | (0.95 ,1.13) | 0.65        |
| High Neighborhood % White                                  | 0.82        | (0.68 ,0.98) | 0.98         | (0.90 ,1.08) | 0.05        |
| High Neighborhood % Foreign Born                           | 1.09        | (0.75 ,1.55) | 0.85         | (0.72 ,1.01) | 0.24        |
| High Neighborhood % Residentially Stable                   | 0.96        | (0.81 ,1.13) | 0.94         | (0.87 ,1.01) | 0.82        |

NOTES: Stratum-specific neighborhood-mortality estimates within strata of ever-stroke status derived from interaction models (interacting neighborhood context variable with stroke status). Model 4 adjusted for demographic variables (stroke status, age, gender, race, ethnicity, southern birth, nativity, and marital status), for SES variables (parental education, education, income, and wealth), and CVD risk factors (physical activity, ADL, IADL, obesity, alcohol use, smoking status, depressive symptoms, hypertension, diabetes, self-rated health). Q=Quartile. Neighborhood social ties modeled with a 3-item index; hazard ratio models a change from 0 to 3 social ties. Neighborhood family income and neighborhood deprivation are modeled in quartiles modeled ordinally; hazard ratio models a change from 4<sup>th</sup> vs. 1<sup>st</sup> quartiles. N=17,960.

SUPPLEMENTAL MATERIAL

*Circulation: Cardiovascular Quality and Outcomes*

“Neighborhood differences in post-stroke mortality”

Osypuk et al.

Appendix Table 4: Stratum-Specific Estimates of Neighborhood Context on Survival (Hazard Ratios of Mortality) within Strata of Time Since Stroke. Model 4.

|                                          | Stroke < 3 mo |              |                | Stroke 3-12 mo |              |                | Stroke >1 yr |              |                | Never Stroke |              |
|------------------------------------------|---------------|--------------|----------------|----------------|--------------|----------------|--------------|--------------|----------------|--------------|--------------|
|                                          | HR            | 95% CI       | p <sup>1</sup> | HR             | 95% CI       | p <sup>1</sup> | HR           | 95% CI       | p <sup>1</sup> | HR           | 95% CI       |
| Higher Neighborhood Social Ties          | 2.90          | (0.97 ,8.61) | 0.03           | 0.75           | (0.40 ,1.41) | 0.71           | 0.90         | (0.67 ,1.20) | 0.74           | 0.85         | (0.76 ,0.95) |
| Higher Neighborhood Family Income        | 0.92          | (0.68 ,1.26) | 0.68           | 1.03           | (0.85 ,1.24) | 0.67           | 0.96         | (0.89 ,1.04) | 0.48           | 0.99         | (0.95 ,1.02) |
| Higher Neighborhood Deprivation          | 1.35          | (1.03 ,1.77) | 0.02           | 0.99           | (0.82 ,1.18) | 0.96           | 0.98         | (0.90 ,1.06) | 0.91           | 0.98         | (0.95 ,1.02) |
| High Neighborhood % Poverty              | 0.93          | (0.43 ,2.01) | 0.82           | 1.05           | (0.67 ,1.63) | 0.92           | 1.11         | (0.92 ,1.34) | 0.44           | 1.02         | (0.94 ,1.12) |
| High Neighborhood % Black                | 1.28          | (0.65 ,2.52) | 0.47           | 0.86           | (0.54 ,1.36) | 0.54           | 1.13         | (0.92 ,1.39) | 0.23           | 0.99         | (0.90 ,1.10) |
| High Neighborhood % White                | 0.54          | (0.26 ,1.11) | 0.09           | 0.87           | (0.56 ,1.35) | 0.53           | 0.81         | (0.65 ,1.00) | 0.05           | 1.01         | (0.91 ,1.11) |
| High Neighborhood % Foreign Born         | 2.04          | (0.56 ,7.41) | 0.16           | 0.83           | (0.27 ,2.59) | 0.93           | 1.12         | (0.72 ,1.73) | 0.15           | 0.79         | (0.66 ,0.94) |
| High Neighborhood % Residentially Stable | 1.70          | (0.75 ,3.88) | 0.16           | 0.84           | (0.53 ,1.34) | 0.62           | 0.96         | (0.79 ,1.17) | 0.88           | 0.95         | (0.88 ,1.02) |

NOTES: Model 4 adjusted for demographic variables, SEP variables, and CVD risk factors.<sup>1</sup> p-value from interaction test of association of neighborhood characteristic with mortality among this time since stroke patient group, contrasted against neighborhood association with mortality among those without stroke. Neighborhood social ties modeled with a 3-item index; hazard ratio models a change from 0 to 3 social ties. Neighborhood family income and neighborhood deprivation are modeled in quartiles modeled ordinally; hazard ratio models a one-quartile change. A subset of these estimates are presented in Figure 2. These results exclude any missing covariate data from the models, n=15,560.

SUPPLEMENTAL MATERIAL

*Circulation: Cardiovascular Quality and Outcomes*

“Neighborhood differences in post-stroke mortality”

Osypuk et al.

Appendix Table 5: Multiple Imputation Results for Stratum-Specific Estimates of Neighborhood Context on Survival (Hazard Ratios of Mortality) within Strata of Time Since Stroke. Model 4.

|                                 | Stroke < 3 mo |              |                | Stroke 3-12 mo |              |                | Stroke >1 yr |              |                | Never Stroke |              |
|---------------------------------|---------------|--------------|----------------|----------------|--------------|----------------|--------------|--------------|----------------|--------------|--------------|
|                                 | HR            | 95% CI       | p <sup>1</sup> | HR             | 95% CI       | p <sup>1</sup> | HR           | 95% CI       | p <sup>1</sup> | HR           | 95% CI       |
| Higher Neighborhood Social Ties | 1.74          | (0.59 ,5.16) | 0.31           | 0.66           | (0.37 ,1.18) | 0.16           | 0.94         | (0.73 ,1.23) | 0.66           | 0.86         | (0.78 ,0.95) |
| Higher Neighborhood Deprivation | 1.29          | (1.03 ,1.62) | 0.03           | 1.02           | (0.86 ,1.20) | 0.85           | 0.98         | (0.90 ,1.05) | 0.53           | 0.99         | (0.95 ,1.02) |
| High Neighborhood % White       | 0.52          | (0.27 ,1.02) | 0.06           | 0.85           | (0.57 ,1.26) | 0.41           | 0.84         | (0.69 ,1.02) | 0.08           | 0.98         | (0.90 ,1.08) |

NOTES: Model 4 adjusted for demographic variables, SEP variables, and CVD risk factors. <sup>1</sup> p-value from interaction test of association of neighborhood characteristic with mortality among this time since stroke patient group, contrasted against neighborhood association with mortality among those without stroke. Neighborhood social ties modeled with a 3-item index; hazard ratio models a change from 0 to 3 social ties. Neighborhood family income and neighborhood deprivation are modeled in quartiles modeled ordinally; hazard ratio models a one-quartile change. For comparison: non-imputed results found in Figure 2 and in Appendix Table 4. N=17,960.
